# Supplementary material for: Functional Divergence among Silkworm Antimicrobial Peptide Paralogs by the Activities of Recombinant Proteins and the Induced Expression Profiles
Source: PubMed Central journal article supplement (PMC3066212; doi:10.1371/journal.pone.0018109), 2011-03-29

Figure S1

A

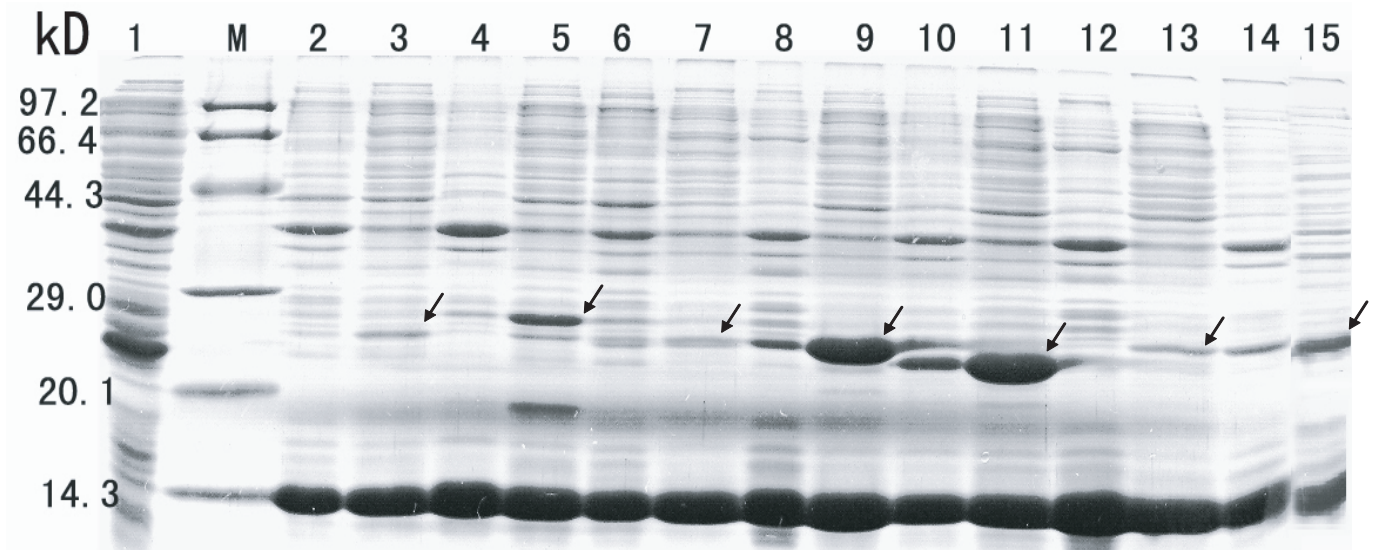

B

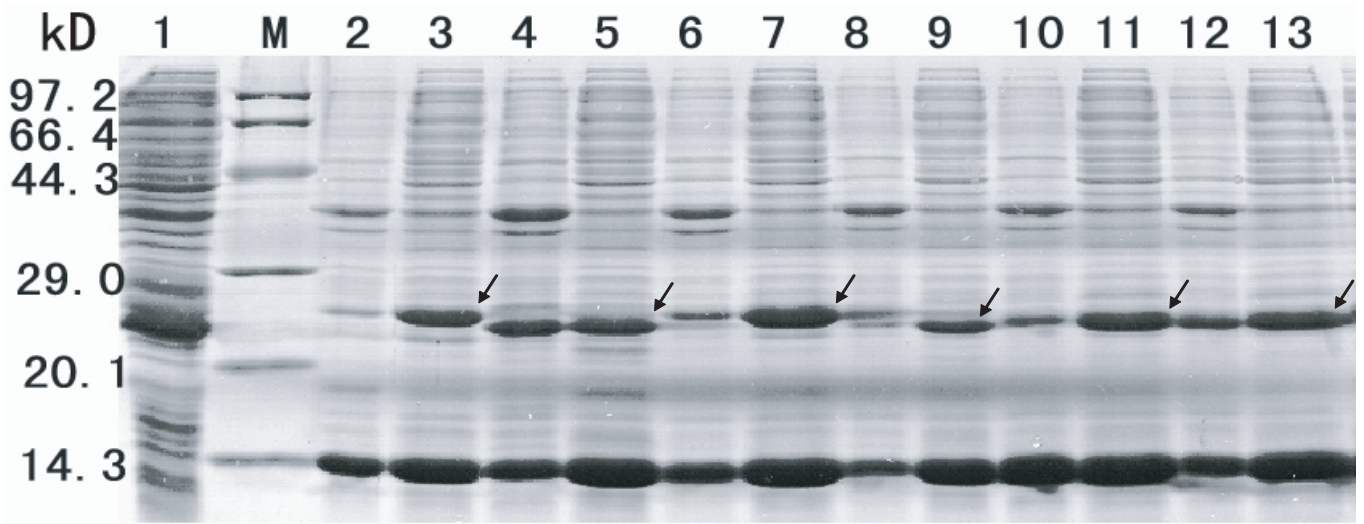

C

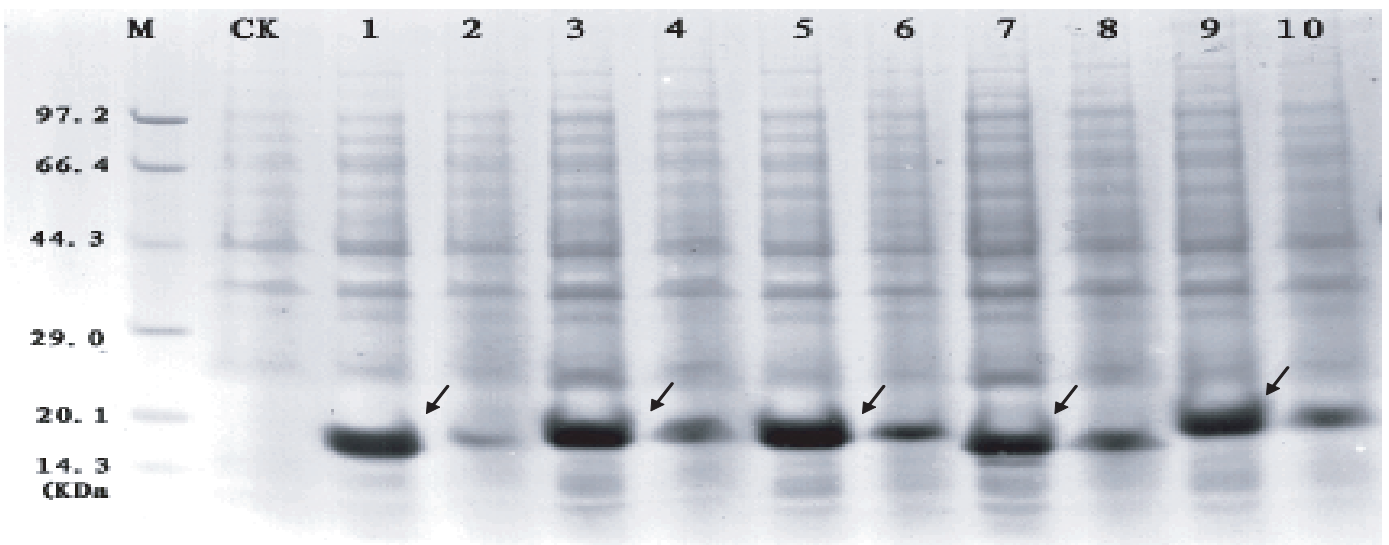

Supplement: pone.0018109.s001.pdf [file pone.0018109.s001.pdf]
