# Supplementary material for: Functional Divergence among Silkworm Antimicrobial Peptide Paralogs by the Activities of Recombinant Proteins and the Induced Expression Profiles
Source: PubMed Central journal article supplement (PMC3066212; doi:10.1371/journal.pone.0018109), 2011-03-29
Supplement: pone.0018109.s004.pdf [file pone.0018109.s004.pdf]

Figure S4

A

BmcecA1 ATG AAT TTC GTA CGT ATT TTG AGC TTC GTC TTC GCG TTG GTG CTG GCT CTC GGC GCG GTC AGC GCT GCT CCT GAG CCC  
BmcecA2 ... ..T ... ..  
BmcecB1 ... ..C. AAG ..C C.A TC. ... ..T C.. ... ..T.G A.. AT. AC. ... ..C ..A ...  
BmcecB2 ... ..C. AAG ..C C.A TC. ... ..T C.. ... ..T.G A.. AT. AC. ..T ... ..C ... ..  
BmcecB3 ... ..C ... ..C. AAG ..C C.A TC. ... ..T C.. ... ..T.G A.. AT. AC. ... ..C ... ..  
BmcecB4 ... ..C. AAG ..C C.A TC. ... ..T C.. ... ..T.G A.. AT. AC. ... ..C ... ..  
BmcecB5 ... ..C. AAG ..C C.A TC. ... ..T C.. ... ..T.G A.. AT. AC. ... ..C ... ..  
BmcecB6 ... ..C. AAG ..C C.A TC. ... ..T C.. ... ..T.G A.. AT. AC. ... ..C ... ..  
BmcecC ... ..C ..T ... AAG ..C C.. T.. G.. ... ..A ... C.C A.. ... ..T.G A.. AT. .CG ..T ..C ..G ..T. ..A ...  
BmcecD ... ..A ... TCG AAA ... ..C GTT ... ..G ... ..T A.T ..T T.C ..C ACG .CT T.. ... TCG ..A ... ..C --- ---  
BmcecE ... ..TC. A.A GC. C.. TTT ..A. ..T ... ..C G.. T.T ... ..TG TGT .CG AGC ..T ..TG ..C ... ..G ..A ..G

BmcecA1 AGG TGG AAA CTC TTC AAG AAA ATT GAG AAA GTG GGA CGC AAC GTT CGC GAT GGA TTA ATC AAA GCG GGT CCA GCT ATA  
BmcecA2 ... ..G ... ..  
BmcecB1 ... ..G A.. ... ..A ... A.. ..C A.G ... A.C ..T ... ..C A.C G.. ... ..C ..G ..G ..C  
BmcecB2 ... ..G A.. ... ..A ... A.. ..C A.G ... A.C ..T ..C ..C A.C G.. ... ..C ..G ..G ..C  
BmcecB3 ... ..G A.. ... ..A ... A.. ..C A.G ... A.. ..T ..C ..C A.C G.. ... ..C ..G ..G ..C  
BmcecB4 ... ..G A.. ... ..A ... A.. ..C A.G ... A.C ..T ..C ..C A.C G.. ... ..C ..G ..G ..C  
BmcecB5 ... ..G A.. ... ..A ... A.. ..C A.G ... A.C ..T ..C ..C A.C G.. ... ..C ..G ..G ..C  
BmcecB6 ... ..G A.. ... ..A ... A.. ..C A.G ... A.C ..T ..C ..C A.C G.. ... ..C ..G ..G ..C  
BmcecC .AA C.. ..G G.. ... ..A .T. ... ..G A.T ..T ... ..T ..C ... ..G. ... G.C ..T .CG ..A ..A ... ..C G.G  
BmcecD --- G.C ..C T.. ... ..G.T C.. ..A ... A.. ..T .AG .GG ... ..A ..C .CC G.C ... .GC ... ..C. ... ..A G.C  
BmcecE ..A ... ..G A.T ... ..C ..A ..G ... ..T .AG ... A.. ..T ... ..G A.. ... ..G ..T ..A ... ..G.C

BmcecA1 GCC GTC ATA GGG CAA GCG AAA TCC TTA GGA AAA TAG --- ---  
BmcecA2 ... ..A ... ..A ... ..G ... --- ---  
BmcecB1 .AG ... C.C ..T TCG ..T ... G.T A.. ... ..GA --- ---  
BmcecB2 .AG ... C.C ..T TC. ..T ... G.. A.. ... ..GA --- ---  
BmcecB3 .AG ... C.C ..T TCG ..T ... G.. A.. ... ..A --- ---  
BmcecB4 .AG ... C.C ..T TCG ..T ... G.T A.. ... ..GA --- ---  
BmcecB5 .AG ... C.T ..T TCG ..T ... G.T A.. ... ..GA --- ---  
BmcecB6 .AG ... C.C ..T TCG ..T ... G.T A.. ... ..GA --- ---  
BmcecC .TG ... G.T ..A ... ..GC. ... G.C ... .TG .AA --- ---  
BmcecD .A. AC. C.G .CA A.. ..A ... G.T C.C ... C.. GGA TAG ---  
BmcecE ..G ..G G.. ... ..G ... GCG A.. A.C .CT C.C GG. AAA TAA

B

Bmmor ATG AAT ATT TTA AAA CTT TTC TTG GTT TTT ATG GTG GCA ATG TCT CTG GTG TCA TGT --- --- AGT ACA GCC GCT CCA  
BmmorA1 ... G.C T.C C.T ..G TA. ... A.T ... G.A C.. ..A ..C C.. ..A T.. A.. GTT ..C --- --- ..G. CAG ... GAT  
BmmorA2 ... T.C T.C C.T ..G TA. ... A.T ... G.A C.. ..A ..C C.. ..A T.. A.. ATT ..C --- --- ..G. CAG ... GAT  
BmmorA3 ... T.C T.C C.T ..G TA. ... A.T ... G.A C.. ..A ..C C.. ..A T.. A.. ATT ..C --- --- ..G. CAG ... GAT  
BmmorB1 ... ..G G.A ..C .GT T.C ... ..GC ..G G.G C.. ..C. ATG C.C GTC ..C A.A ATG G.C GGA ACT ..C G.G ... C.. GA.  
BmmorB2 ... ..G G.G ..C .GT ..A ... ..GC ..G G.G C.. ..C. ATG C.C GTC ..C A.A ATG G.C GGA ACT ..C G.G ... C.. GA.  
BmmorB3 ... ..G G.A ..C .GT T.C ... ..GC ..G G.G C.. ..C. ATG C.C GTC ..C A.A ATG G.C GGA ACT ..C G.G ... C.. GA.  
BmmorB4 ... ..G G.G ..C .GT A.A ... ..GC ..G G.G C.. ..C. ATG C.C GTC ..C A.A ATG G.C GGA ACT ..C G.G ... C.. GA.  
BmmorB5 ... ..G G.G ..C .GT ..A ... ..GC ..G G.G C.. ..C. ATG C.C GTC ..C A.A ATG G.C GGA ACT ..C G.G ... C.. GA.  
BmmorB6 ... ..G G.G ..C .GT A.A ... ..GC ..G G.G C.. ..C. ATG C.C GTC ..C A.A ATG G.C GGA ACT ..C G.G ... C.. GA.  
BmmorB7 ... ..G G.A ..C .GT T.C ... ..GC ..G G.G C.. ..C. ATG C.C GTC ..C A.A ATG G.C GGA ACT ..C G.G ... C.. GA.  
BmmorB8 ... ..G G.A ..C .GT T.C ... ..GC ..G G.G C.. ..C. ATG C.C GTC ..C A.A ATG G.C GGA ACT ..C G.G ... C.. GA.

Bmmor GCA AAA ATA CCT ATC AAG GCC ATT AAG ACT GTA GGA AAG GCA GTC GGT AAA GGT CTA AGA GCC ATC AAT ATC GCC AGT  
BmmorA1 C.G ... ..T ... G.. ..A AGT C.G ... ..AG .GT ... ..A ATT A.T .CC ... ..C T.T .A. .TT C.. .CC GCA ..G G.A  
BmmorA2 C.G ... ..T ... G.. ..A AGT C.G ... ..AG .GT ..G ..A ATT A.T .CC ... ..C T.T .A. .TT C.. .CC GCA ..G G.A  
BmmorA3 C.G ... ..T ... G.. ..A AGT C.G ... ..AG .GT ..G ..A .TT A.T .CC ... ..C T.T .A. .TT C.. .CC GCA ..G G.A  
BmmorB1 C.T ..G GGC ATC GGG ..A AT. ..C .GA .AG .GC ..G ..A .TT A.T AAA C.T ..A ..T .CC ..A ..A GGC G.A .GA GC.  
BmmorB2 C.T ..G GGC ATC GGG ..A AT. ..C .GA .AG .GC ..G ..A .TT A.T AAA C.T ..A ..T .CC ..A ..A GGC G.A .GA GC.  
BmmorB3 C.T ..G GGC ATC GGG ..A AT. ..C .GA .AG .GC ..G ..A .TT A.T AAA C.T ..A ..T .CC ..A ..A GGC G.A .GA GC.  
BmmorB4 C.T ..G GGC ATC GGG ..A AT. ..C .GA .AG .GC ..G ..A .TT A.T AAA C.C ..G ..G .CC .T. ... GGC G.. .GG GCC  
BmmorB5 C.T ..G GGC ATC GGG ..A AT. ..C .GA .AG .GC ..G ..A ATT A.T AAA C.T ..G ..G .CC .T. ... GGC G.. .GG GCC  
BmmorB6 C.T ..G GGC ATC GGG ..A AT. ..C .GA .AG .GC ..G ..A .TT A.T AAA C.T ..A T.. .CC .TA ... GGC G.T .GA GCC  
BmmorB7 C.T ..G GGC ATC GGG ..A AT. ..C .GA .AG .GC ..G ..A .TT A.T AAA C.T ..A ..T .CC ..A ..A GGC G.A .GA GC.  
BmmorB8 C.T ..G GGC ATC GGG ..A AT. ..C .GA .AG .GC ..G ..A .TT A.T AAA C.T ..A ..T .CC ..A ..A GGC G.A .GA GC.

Bmmor ACA GCC AAC GAT GTT TTC AAT TTC TTG AAA CCG AAG AAA AGA AAG CAT TAA  
BmmorA1 ... ..C.T ..A ..C .AT .GC CA. G.. CGT AAC CGT GGG .AT C.A GG. ...  
BmmorA2 ... ..C.T ..A ..C .AT .GC CA. G.. CGT AAC CGT GG. .AT C.A GG. ...  
BmmorA3 ... ..C.T ..A ..C .AT .GC CA. G.. CGT AAC CGT GGG .AT C.A GG. ...  
BmmorB1 G.C .GA C.. ..G ..C .A. C.A GA. .C. ... AAC .GC GG. T.. --- --- ---  
BmmorB2 G.C .GA C.. ..G ..C .A. C.A GA. .C. ... AAC .GC GG. T.. --- --- ---  
BmmorB3 G.T .GA C.. ..G ..C .A. C.A GA. .C. ... AAC .GC GG. T.. --- --- ---  
BmmorB4 G.T .GA C.. ..C .CC .A. C.A CAG .C. C.G AAC .GC GG. T.. --- --- ---  
BmmorB5 G.C .GA C.. ..C .CC .A. C.A CAG .C. C.G AAC .GC GG. T.. --- --- ---  
BmmorB6 G.. .GA C.T ..A ..C .A. C.A GAG .CA ..G AAC .GC GGC T.. --- --- ---  
BmmorB7 G.C .GA C.. ..G ..C .A. C.A GA. .C. ..A AAC .GC GG. T.. --- --- ---  
BmmorB8 G.C .GA C.. ..G ..C .A. C.A GA. .C. ..A AAC .GC GG. T.. --- --- ---

C

Bmglv1 ATG TAT TCC AAG GTG TTG --- TTA TCC GCT GCA CTC CTT GTA TGC GTG AAC GCT CAA GTT TCT ATG CCT CCT GGT TAC  
Bmglv2 ... A.. ..A ..T C.. ..T TAT A.C .T. ... A.. ACT ..G ..G ..T ..T ... ..A G.. ... .AC GGA ... T.. ..A. ...  
Bmglv3 ... A.. ... ..A T.. C.. TTT ..C AT. ..C A.. G.. ..G ..G ..T ..A ... ..A G.. ..A .AC .G. T.. T.. ..A. ..T  
Bmglv4 ... A.. ... ..A C.A ..A TAT ..C .T. ..C A.G G.. ..G ..G ..T ..C ... ..A G.. ... .A. --- --- T.G .AG ...

Bmglv1 GCA GAG AAG TAT CCG ATC ACC AGC CAA TTT TCA AAG TCA GTC CGA CAC CCT CGC GAT ATT CAC GAC TTT GTC ACT TGG  
Bmglv2 ... ..A G.T ..C T.. ... ..G. G.G ... ..CC ... ..G. --- --- ... ..C ..T ..C --- --- ---  
Bmglv3 .A. A.A G.A ..C ..C ... ..GA G.. .T. ... ..G. --- --- ... ..C ..T ..C --- --- ---  
Bmglv4 .A. ..A GGA ... ..A ..T .G. G.T ..G ..C ... ..G. --- --- ... ..G ..T ..C --- --- ---

Bmglv1 GAC AAG GAA ATG GGG GGA GGG AAG GTC TTC GGG ACT TTG GGA GAG AGC GAC CAA GGA CTT TTT GGT AAA GGT GGT TAC  
Bmglv2 ... ..C A.. ... ..C ... ..T ..C ... ..C.A ..A. ..T G.T ..C ..C ... ..A ... ..C. ... ..  
Bmglv3 ... ..C. AG. ... ..A ... ..C ... ..C.A ..A. ... G.T ..A ..C ... ..A ..C ... ..CC ... ..  
Bmglv4 ..T ..A C.. G.. ..A ... ..C ... ..C.. ..C.C.A ..A. ..T G.T ..G ... ..C ... ..CC ... ..

Bmglv1 AAC AGG GAG TTC TTC AAT GAT GAC CGC GGC AAA CTG ACC GGA CAG GCT TAC GGC ACC AGA GTA TTA GGG CCT GGA GGC  
Bmglv2 ... .AA ... A.. ..T ... ..C ... ..A ... ..T ... ..T ... ..G ..T ... ..A ... ..  
Bmglv3 ... ..A ... A.T ... ..C ... ..T C.G ..A ... ..C ... ..G ..C ... ..A ..C ... ..T  
Bmglv4 ... ..A ... A.. ... ..T ... ..G ... ..C ... ..G ..C ... ..C ..G ..A ..C ..C. ..G

Bmglv1 GAC AGT ACC AGT TAC GGT GGT CGT CTA GAC TGG GCC AAT GAG AAC GCC AAG GCT GCT ATT GAC TTG AAC AGG CAA ATT  
Bmglv2 ... ..C ... .AC ... ..C ..A ..C ... ..G ..C A.. ..T ..A C.A ..C A.. ... ..C.A ..T ..A ... ..C  
Bmglv3 ... ..C ..T .AC ... ..A ... ..G ... ..C A.. ... ..A C.A ... ..C ... ..A.A ... ..A ... ..C  
Bmglv4 ... ..A ..A .AC ... ..A ... ..A ... ..A.. ..T .G G.A ... ..T A.A ..T ..A ..G ..C

Bmglv1 GGT GGC AGC GCT GGG ATA GAA GCA TCA GCT TCC GGC GTG TGG GAT CTT GGT AAG AAC ACT CAC TTG TCA GCC GGC GGA  
Bmglv2 ... ..A T.. ... ..G AC. ... ..GC ... ..T ... ..G .A. ... ..C ... ..T ..T ... ..T ..T  
Bmglv3 ..A ... ..A T.. ... ..G AC. ..C ..G .GC ... ..T ... ..A. ... ..C ... ..A.C ... ..T  
Bmglv4 ..A ... ..A T.. ..A ..G AC. ... A.. .G. ..A ..A ... ..AC ... ..C .G. C.C ... ..T

Bmglv1 GTG GTC TCT AAG GAG TTC GGT CAC AGA AGG CCT GAT GTC GGT TTA CAG GCC CAG ATT ACT CAC GAG TGG TAA  
Bmglv2 A.. ... ..G ... ..A ... ..A ..A ..C ... ..C.T ..A ..A G.. ..C CGC ..T ..T ... ..G.  
Bmglv3 A.. ... ..G ... ..A ..T ... ..A ..A ..C ..T ... C.T ..A ..A G.. ..C CGG ..T ... ..G.  
Bmglv4 A.. A.. ..G ... ..A ... ..A ..G ..C ... ..C G.C ... ..A G.. T.C CGC ..T ..T ... ..G.
