# Supplementary material for: Functional Divergence among Silkworm Antimicrobial Peptide Paralogs by the Activities of Recombinant Proteins and the Induced Expression Profiles
Source: PubMed Central journal article supplement (PMC3066212; doi:10.1371/journal.pone.0018109), 2011-03-29
Supplement: pone.0018109.s005.pdf [file pone.0018109.s005.pdf]

Figure S5

A

```

      *      20      *      40      *      60
BmcecA1 : MNFVRIISFVFALVLALGAVSAAPEPRWKLFFKKIEKVGGRNVRDGLIKAGPAIAVIGQAKSLGK-- : 63
BmcecA2 : MNFVRIISFVFALVLALGAVSAAPEPRWKLFFKKIEKVGGRNVRDGLIKAGPAIAVIGQAKSLGK-- : 63
BmcecB5 : MNFAKILSFVFALVLALSMTSAAPEPRWKLFFKKIEKMGGRNIRDGIVKAGPAIEVLGSAKAIGK-- : 63
BmcecB6 : MNFAKILSFVFALVLALSMTSAAPEPRWKLFFKKIEKMGGRNIRDGIVKAGPAIEVLGSAKAIGK-- : 63
BmcecB3 : MNFAKILSFVFALVLALSMTSAAPEPRWKLFFKKIEKMGGRNIRDGIVKAGPAIEVLGSAKAIGK-- : 63
BmcecB4 : MNFAKILSFVFALVLALSMTSAAPEPRWKLFFKKIEKMGGRNIRDGIVKAGPAIEVLGSAKAIGK-- : 63
BmcecB1 : MNFAKILSFVFALVLALSMTSAAPEPRWKLFFKKIEKMGGRNIRDGIVKAGPAIEVLGSAKAIGK-- : 63
BmcecB2 : MNFAKILSFVFALVLALSMTSAAPEPRWKLFFKKIEKMGGRNIRDGIVKAGPAIEVLGSAKAIGK-- : 63
BmcecC  : MNFVKILCVVLALMLALSMAAALPEPKRKFVKIIEKIGRNVGGVITAGPAVVVVGQAASVGM-- : 63
BmcecE  : MNFSRALFYVFAVFLVCASVMAAPEPRWKLFFKKIEKVGQNRDGIKAGPAVAVVGQAATIAHGK : 65
BmcecD  : MKISKIFVVFVAIVFATASVSAAPG---NFKDLEKMGQRVRDAVISAAPAVDTLAKAKALGQG- : 61
Mnf 4i1 VfA6 lal sAApep wk FkK6EK6Grn6Rdg66kAgPA6 v6g Ak 6g

```

B

```

      *      20      *      40      *      60
BmmorB7 : MKVFSFFCVVLAMLVLIIMGGTSAAPEPKGIGKIIIRKGGKVIKHGLTAIGVGAAGHEVYQDSKNSG--- : 65
BmmorB8 : MKVFSFFCVVLAMLVLIIMGGTSAAPEPKGIGKIIIRKGGKVIKHGLTAIGVGAAGHEVYQDSKNSG--- : 65
BmmorB3 : MKVFSFFCVVLAMLVLIIMGGTSAAPEPKGIGKIIIRKGGKVIKHGLTAIGVGAAGHEVYQDSKNSG--- : 65
BmmorB1 : MKVFSFFCVVLAMLVLIIMGGTSAAPEPKGIGKIIIRKGGKVIKHGLTAIGVGAAGHEVYQDSKNSG--- : 65
BmmorB2 : MKVFSLFCVVLAMLVLIIMGGTSAAPEPKGIGKIIIRKGGKVIKHGLTAIGVGAAGHEVYQDSKNSG--- : 65
BmmorB4 : MKVFSIFCVVLAMLVLIIMGGTSAAPEPKGIGKIIIRKGGKVIKHGLTVIGVGAAGHDAYQQSQNSG--- : 65
BmmorB5 : MKVFSLFCVVLAMLVLIIMGGTSAAPEPKGIGKIIIRKGGKVIKHGLTVIGVGAAGHDAYQQSQNSG--- : 65
BmmorB6 : MKVFSIFCVVLAMLVLIIMGGTSAAPEPKGIGKIIIRKGGKVIKHGLTVIGVGAAGHEVYQESKNSG--- : 65
BmmorA2 : MYFLKYFIVVLVALSLMICSGQADPKIP--VKSLKKGKVIKAGFKVLTAAAGTAHEVYSHVRNRGNQG : 66
BmmorA3 : MYFLKYFIVVLVALSLMICSGQADPKIP--VKSLKKGKVIKAGFKVLTAAAGTAHEVYSHVRNRGNQG : 66
BmmorA1 : MDFLKYFIVVLVALSLMVCSGQADPKIP--VKSLKKGKVIKAGFKVLTAAAGTAHEVYSHVRNRGNQG : 66
Bmmor   : MNILKLEFLVFMVAMSLVSCSTAAPAKIP--IKAIKTVGKAVGKGLRAINIASTANDVFNFLKPKKRKH : 66
M      F Vv6 6 L6 A p K 64kgGK 6 G 6 h v5 n g

```

C

```

      *      20      *      40      *      60      *      80      *
Bmglv3 : MNSKLLFFIATVLCVNAEVYRSSDYEKEYPIRGLFSK--RHPRD----VTWDTRMGGGKVFVGTGQNDGDLFGKAGYNREIFNDDRGL : 84
Bmglv4 : MNSKLLYFFIATVLCVNAEVY--SEYEEGYPIISGQFSK--RHPRD----VTWQKQVGGGKVFVGTGQNDGDLFGKAGYNREIFNDDRGL : 82
Bmglv2 : MNSNLFYIFAITVLCVNAEVYGPSDYAEDYSISGQSSR--RHPRD----VTWQKQVGGGKVFVGTGQNDGDLFGKAGYNREIFNDDRGL : 84
Bmglv1 : MYSKVLIS-AALLVCVNAQVSMPPGYAEKYPIITISQFSKSVRHPRDIHDFVTWTRMGGGKVFVGTGQNDGDLFGKAGYNREIFNDDRGL : 89
MnSk6l At LVCVNA2Vy s Y e YpI gqfS4 RHPRD VTWd 6GGGKVFVGTG2nDdGLFGKaGYN4EiFNDDRGL

      100      *      120      *      140      *      160      *
Bmglv3 : TGQAYGTRVLGPGGDSTNYGGRLDWANKNAQAAIDINRQIGGRSGMTASGSGVWDLDKNTHISAGGMVSKEFGHRRPDVGLQAEIRHEW : 173
Bmglv4 : TGQAYGTRVLGPAGDSTNYGGRLDWANKNAEAAIDINRQIGGRSGMTATGSGVWDLDKNTRLISAGGMISKEFGHRRPDVGVQAEFRHDW : 171
Bmglv2 : TGQAYGTRVLGPGGDSTNYGGRLDWANKNAQATIDLNRQIGGRSGMTASGSGVWDLDKNTHFSAGGMVSKEFGHRRPDVGLQAEIRHDW : 173
Bmglv1 : TGQAYGTRVLGPGGDSTSYGGRLDWANENAKAAIDLNRQIGGSAGIEASASGVDLGNKTHLSAGGVVSKEFGHRRPDVGLQAOITHEW : 178
TGQAYGTRVLGPgGDSTnYGGRLDWANKNA AaID6NRQIGGrS6tA3gSGVWDLdKNTh SAGG66SKEFGH4RPDVG6QA2irH W

```
