# Supplementary material for: Functional Divergence among Silkworm Antimicrobial Peptide Paralogs by the Activities of Recombinant Proteins and the Induced Expression Profiles
Source: PubMed Central journal article supplement (PMC3066212; doi:10.1371/journal.pone.0018109), 2011-03-29
Supplement: pone.0018109.s007.pdf [file pone.0018109.s007.pdf]

Table S1 Cloning primers for recombinant expression of antibacterial peptides

| Name     | Forward primer                                             | Reverse primer                                    | Forward primer                                              |
|----------|------------------------------------------------------------|---------------------------------------------------|-------------------------------------------------------------|
| BmcecA1  | CATGCCATGGTTAGGTGAAACTCTCAAG                               | GATATCTCGAGTCATAAGGATTTGCTTGCCTATG                |                                                             |
| BmcecB6  | CATGCCATGGTTAGGTGGAAGATCTCAAG                              | GACCCTCGAGTCAGATAGCTTTAGCCGAACCAAGG               |                                                             |
| BmcecC   | CGCGCCATGGTTAAACGGAAGGTCTTCAAATAA                          | ATATCTCGAGTCAGACGGATGCCGTTGTCCAACG                |                                                             |
| BmcecD   | CAGTCCATGGCAACTTCTCAAGGATC                                 | CCGCTCGAGTCATTGTCCGAGAGCTTTTGCITTTG               |                                                             |
| BmcecE   | CATGCCATGGTTAGATGGAAGATTTCAAG                              | ATATCTCGAGTCAGATGGTCGCCCTGCC                      |                                                             |
| BmgIv1   | CGAACCATGGTTTCTATGCCTCTGGTTACGC                            | GCAAGGCCACTCGAGCCACTCGTGAGTAATCTG                 |                                                             |
| BmgIv2   | CATGCATGGTTTACGGACCTTCTGATTACG                             | AAACTCGAGCCA(A/C)TCATG(G/C)CGGA(A/T)CTCTG         |                                                             |
| BmgIv3   | GCGCGCCATGGTATACAGGTCTCTGATTATG                            | AAACTCGAGCCA(A/C)TCATG(G/C)CGGA(A/T)CTCTG         |                                                             |
| BmgIv4   | GTAACCATGGTTTATTTCGGAGTACGAAGAAGGATATCCA(A/G)TTAG          | AAACTCGAGCCA(A/C)TCATG(G/C)CGGA(A/T)CTCTG         |                                                             |
| Bmmor    | CATGCCATGGCAAAAATACCTATCAAGGCCATTAAGACTGTAGGAAAGGCAGTCGGTA | CCGCTCGAGTCAATGCTTTCTTTCTTCGGTTTCAAGAAATGAAAACATC | GAAAGGCAGTCGGTAAAGGTCTAAGAGCCATCAATATCGCCAGTACAGCCAACGATGT  |
| BmmorLA1 | CATGCCATGGCAAAAATTCTGTCAAAAGTCTGAAGAAGGGTGAAAAATTA         | CCGCTCGAGTCAACGCACGTGGCTATAGACTTCATGGGCTGTTCCCGC  | AAGGGTGAAAAATTATTGCCAAAGGCTTTAAAGTTCTCACCCGACGGGAACA        |
| BmmorLB1 | CATGCCATGGAACCTAAGGGCATCGGAAAAATCATCAGAAAGGGCGGGAAA        | CCGCTCGAGTCATCCGCTGTTTTTCGAGTCTGGTAGACCTCGTGTC    | CAGAAAGGGCGGGAAAAGTTATTAACATGGACTTACCGCAATAGGCGTAGGAGCTGCCG |
| BmmorLB5 | CATGCCATGGAACCTAAGGGCATCGGAAAAATCATCAGAAAGGGCGGGAAA        | CCGCTCGAGTCATCCGCTGTTCTGCGACTGTGGTAGGCGTCG        | CAGAAAGGGCGGGAAAATTATTAACATGGGCTGACCGTATCGGCGTCGGGCGCCCG    |
| BmmorLB6 | CATGCCATGGAACCTAAGGGCATCGGAAAAATCATCAGAAAGGGCGGGAAA        | CCGCTCGAGTCAGCCGCTGTTCTTGTACTCTTGGTAGACTTCATGTCC  | CAGAAAGGGCGGGAAAAGTTATTAACATGGATTAACCGTAATCGGCGTTGGAGCCGCAG |
