# Supplementary material for: Functional Divergence among Silkworm Antimicrobial Peptide Paralogs by the Activities of Recombinant Proteins and the Induced Expression Profiles
Source: PubMed Central journal article supplement (PMC3066212; doi:10.1371/journal.pone.0018109), 2011-03-29
Supplement: pone.0018109.s008.pdf [file pone.0018109.s008.pdf]

Table S2 Primers for quantitative real-time RT-PCR

| <b>Name</b> | <b>Forward primer</b>      | <b>Reverse primer</b>     |
|-------------|----------------------------|---------------------------|
| BmcecA1     | CGTACGTATTTTGAGCTTCGTCTTC  | AGGATTTGCTTGCCCTATGA      |
| BmcecB6     | GCAAAGATCCT ATCCTTCGTC     | GAACCAAGGACCTCGATCGCC     |
| BmcecD      | GTTTTCGCCACGGCTTCGGTCTC    | GTCCGAGAGCTTTTGCTTTTGCCAG |
| BmcecE      | CTCAAGAGCTCTGTTTTACGTTTTTC | TGTTCTGACCCACCTTTTTCG     |
| Bmglv1      | AAGGTGTTGTTATCCGCTG        | GCAAAGTCGTGAATATCGC       |
| Bmglv2      | ATTACTCGATCAGCGGGCAATCC    | GCCGTAGTTGGTGCTGTCTG      |
| Bmglv3      | GCCGCAGAAGTATACAGGTC       | CGGAGCCCAGGCTGTC          |
| Bmglv4      | CTATTATATTTCTTCGCCACG      | CGGAACTCTGCCTGGACG        |
| Bmmor       | GGCAATGTCTCTGGTGTGATGTAG   | GCTTTCTTTTCTTCGGTTTC      |
| BmmorLA1    | ATTGATGGTTTGCAAGTGGACAGGC  | ACCTTGATTCCCACGGTTACGCACG |
| BmmorLB6    | G TTCAGTATATTCTGCGTGG      | TCTTTGACTCTTGGTAGACTTC    |
| Actin A3    | CGGAAATCGTTCGTGAT          | ACGAGGGTTGGAAGAGGG        |
